# Supplementary material for: Photocatalytic degradation of pentachlorophenol by N-F-TiO2: identification of intermediates, mechanism involved, genotoxicity and ecotoxicity evaluation
Source: Royal Society of Chemistry journal article supplement (doi:10.1039/c4pp00254g), 2014-09-01
Supplement: c4pp00254g1.pdf [file c4pp00254g1.pdf]

Table 1S: Properties of the employed N-F-TiO<sub>2</sub> photocatalyst

| Property              | N-F-TiO <sub>2</sub> |
|-----------------------|----------------------|
| Crystal phase         | anatase              |
| crystallite size (nm) | 17.7                 |
| Band-gap energy (eV)  | 2.96                 |
| PZC                   | 5.7                  |

**Table 2S:** Operating chromatographic conditions adopted for the identification of TPs A) using GC-MS system, B)HR-LC–MS

| <b>A</b>                                      |                                                                                            |
|-----------------------------------------------|--------------------------------------------------------------------------------------------|
| Carrier gas flow rate (ml min <sup>-1</sup> ) | 1.70                                                                                       |
| Ion source temperature (° C)                  | 200                                                                                        |
| Injector temperature (° C)                    | 220                                                                                        |
| Transfer line temperature (° C)               | 280                                                                                        |
| Injection volume (µL)                         | 1                                                                                          |
| Injection mode                                | splitless                                                                                  |
| Ionization mode                               | EI                                                                                         |
| Ionization potential                          | 70 eV                                                                                      |
| Column                                        | SLB-5ms (30m×0.25mm and 0.25 µm film thickness) Supelco                                    |
| Column program of temperatures                | 0 °C - 70 °C - 2 min<br>6 °C - 280 °C - 2 min<br>10 °C - 300 °C - 2 min                    |
| Analysis time (min)                           | 43.00                                                                                      |
| Scan range                                    | <i>m/z</i> 50 to 550                                                                       |
| <b>B</b>                                      |                                                                                            |
| Flow rate (µl min <sup>-1</sup> )             | 300                                                                                        |
| Injection volume (µL)                         | 10                                                                                         |
| Column                                        | C18 Hypersil Gold ( 100 mm x 2.1 mm i.d., 1.9 µm particle size (Thermo Fisher Scientific). |
| Column temperature (°C)                       | 40                                                                                         |
| Mobile phase A                                | H <sub>2</sub> O/ 5mM NH <sub>4</sub> C <sub>2</sub> H <sub>3</sub> O <sub>2</sub>         |
| Mobile phase A                                | H <sub>2</sub> O /5mM NH <sub>4</sub> C <sub>2</sub> H <sub>3</sub> O <sub>2</sub>         |
| Gradient grade program (A/B)                  | 90/10 in 0 min (0.5 min)<br>0/100 in 6 min (2 min)<br>90/10 in 8.1 min (3.9 min)           |
| Analysis time (min)                           | 12                                                                                         |
| Ionization mode                               | ESI                                                                                        |
| Source voltage (kV)                           | 2.90                                                                                       |
| Capillary voltage (V)                         | -30                                                                                        |
| Capillary temperature (°C)                    | 320                                                                                        |
| Auxiliary gas flow rate (arbitrary units)     | 10                                                                                         |
| Sheath gas flow rate (arbitrary units)        | 35                                                                                         |
| Normalized collision energy (eV)              | 35                                                                                         |

**Table 3S.** Induction of BNMN, total MN and CBPI values in human lymphocytes treated with PCP concentrations (mg L<sup>-1</sup>)

|    | <b>BNMN<br/>MF(‰) ± se</b>                             | <b>MN<br/>MF(‰) ± se</b> | <b>CBPI<br/>MF(‰) ± se</b> |
|----|--------------------------------------------------------|--------------------------|----------------------------|
| 0  | 3.5±0.5                                                | 3.5±0.5                  | 1.98±0.10                  |
| 1  | 5.0±0.0                                                | 5.5±0.5                  | 1.87±0.02***               |
| 5  | 11.0±2.0**                                             | 11.0±2.0**               | 1.85±0.03***               |
| 10 | 7.5±2.5                                                | 8.0±3.0*                 | 1.45±0.01***               |
| 15 | 6.0±1.0                                                | 6.0±1.0                  | 1.49±0.08***               |
| 20 | data could not be measured as a result of cytotoxicity |                          |                            |
| 25 | data could not be measured as a result of cytotoxicity |                          |                            |
| 30 | data could not be measured as a result of cytotoxicity |                          |                            |

PCP: pentachlorophenol, BNMN: micronucleated binucleated cells, MN: micronuclei, CBPI: Cytokinesis Block Proliferation Index, MF(‰) ± se: mean frequencies (‰) ± standard error, MN were scored in 2000 binucleated lymphocytes per experimental point, \*  $p < 0.05$ , \*\*  $p < 0.01$ , \*\*\*  $p < 0.001$  [G-test for BNMN and MN;  $\chi^2$  for CBPI]

**Table 4S.** Rate constants, correlation coefficients and half-life for the photocatalytic degradation of PCP in the presence of scavengers

| <b>System</b>                    | <b>k (min<sup>-1</sup>)</b> | <b>R<sup>2</sup></b> | <b>t<sub>1/2</sub></b> | <b>%Δk</b> |
|----------------------------------|-----------------------------|----------------------|------------------------|------------|
| <b>Control</b>                   | 0.032                       | 0.9955               | 21.6                   | -          |
| <b>2-i-PrOH</b>                  | 0.0024                      | 0.9218               | 288.8                  | 92.5       |
| <b>N<sub>3</sub><sup>-</sup></b> | 0.0068                      | 0.9113               | 101.9                  | 78.7       |
| <b>I<sup>-</sup></b>             | 0.0050                      | 0.9165               | 138.6                  | 84.4       |
| <b>p-BQ</b>                      | 0.0079                      | 0.9177               | 87.7                   | 75.3       |
| <b>Cr(VI)</b>                    | 0.0101                      | 0.9276               | 68.6                   | 68.4       |
